# Supplementary material
Source: publisher site journal article supplement (https://www.jstage.jst.go.jp/article/geochemj/47/1/47_2.0240/_supplement/_download/47_2.0240_1.pdf)
Supplement: Supplementary file 1 [file 47_2.0240_1.pdf]

## Supplementary Materials

Table S1. Chemical composition of the basaltic rocks used in this study (weight %).

| SiO <sub>2</sub> | TiO <sub>2</sub> | Al <sub>2</sub> O <sub>3</sub> | Fe <sub>2</sub> O <sub>3</sub> | MnO   | MgO  | CaO  | Na <sub>2</sub> O | K <sub>2</sub> O | P <sub>2</sub> O <sub>5</sub> |
|------------------|------------------|--------------------------------|--------------------------------|-------|------|------|-------------------|------------------|-------------------------------|
| 53.8             | 1.27             | 14.7                           | 14.7                           | 0.222 | 4.08 | 9.17 | 2.17              | 0.44             | 0.119                         |

Table S2. The measured concentrations of Si, Na, Al, K, Fe and P in the cooling bath measured at 1271 hours later and the calculated concentrations of the elements in the original 340 °C fluids in the reaction bath.

|    | C <sub>measured</sub> (mol/L) | C <sub>original</sub> (mol/L) |
|----|-------------------------------|-------------------------------|
| Si | 2.63.E-02                     | 3.36.E-02                     |
| Na | 9.27.E-04                     | 1.18.E-03                     |
| Al | 3.11.E-04                     | 3.98.E-04                     |
| K  | 1.07.E-04                     | 1.36.E-04                     |
| Fe | 4.26.E-05                     | 5.44.E-05                     |
| P  | 1.50.E-05                     | 1.89.E-05                     |
